# Supplementary material
Source: PubMed Central journal article supplement (PMC2978600)
Supplement: supp_M110.180380_jbc.M110.180380-1.pdf [file supp_M110.180380_jbc.M110.180380-1.pdf]

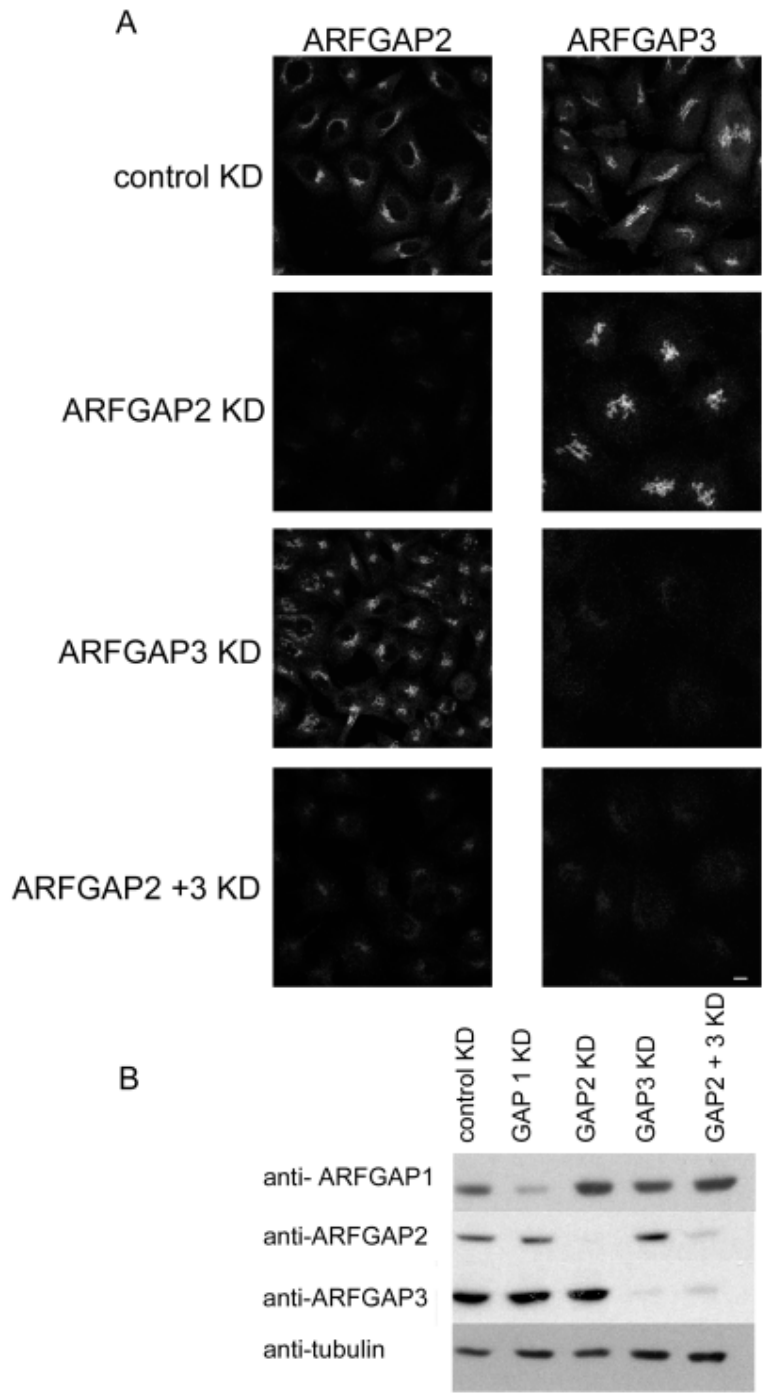

**Supplementary Figure 1. Knockdown of ARFGAP1-3 by siRNA.** (A) Knockdown of ARFGAP2 (left) or ARFGAP3 (right) evaluated by immunocytochemistry demonstrates specific knockdown of the ARFGAPs. Scale bar is 10  $\mu$ m. (B) Western blot of cell lysates from cells treated with siRNA against the ARFGAPs demonstrates efficient knockdown of single or ARFGAP2 and ARFGAP3
